# Supplementary material
Source: PubMed Central journal article supplement (PMC5493326)
Supplement: NIHMS871397-supplement-1.pdf [file NIHMS871397-supplement-1.pdf]

**Figure S1. Transcript origin analysis of up-regulated placenta genes.**

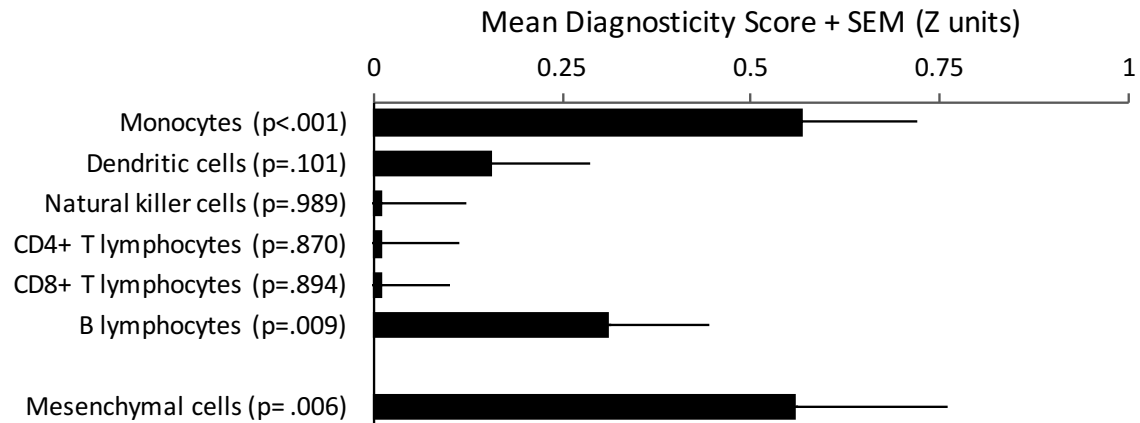

**Legend:** Using reference profiles from leukocyte gene expression studies, these analyses identified monocytes, B-lymphocytes, and mesenchymal cells as major sources of placental transcripts upregulated with disadvantage.

**Figure S2. Transcript origin analysis of cord blood genes.**

**A. Upregulated**

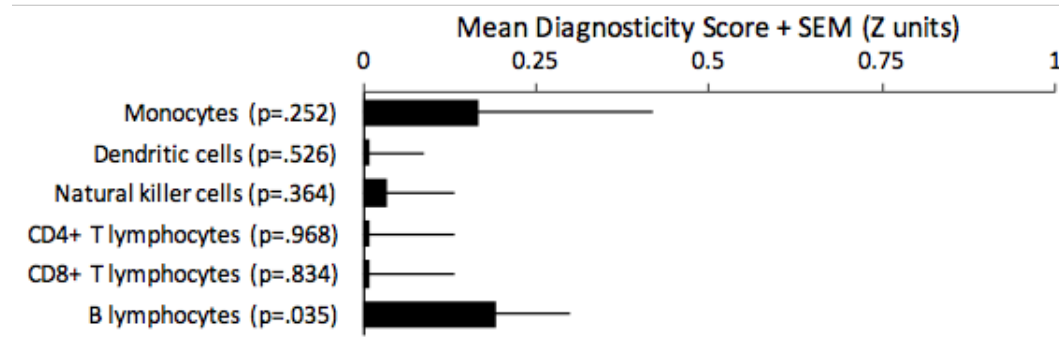

**B. Downregulated**

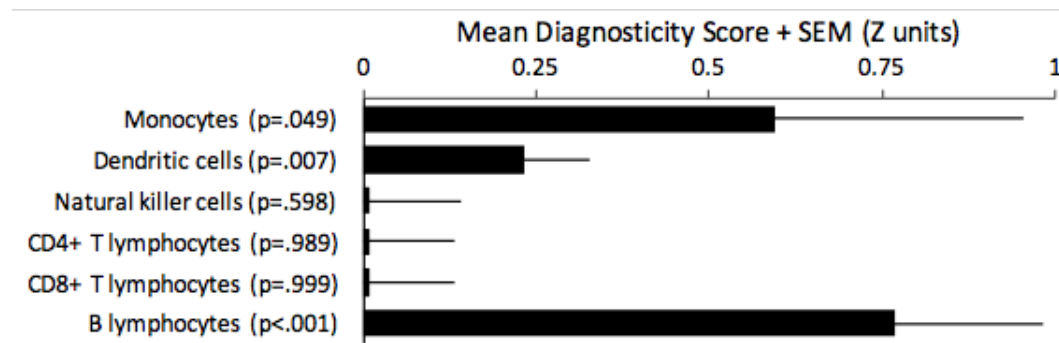

**Legend:** Using reference profiles, these analyses identified B-cells as primary source of transcripts upregulated with disadvantage (Panel A), and monocytes, dendritic cells, and B-cells as source of down-regulated transcripts (Panel B).
