# Supplementary material
Source: PubMed Central journal article supplement (PMC5493326)
Supplement: NIHMS871397-supplement-2.pdf [file NIHMS871397-supplement-2.pdf]

**Table S1.** Differentially expressed genes in placenta by maternal disadvantage.

**Upregulated with Disadvantage**

LOC100008589  
KRT6A  
S100A4  
SFRP1  
LOC391532  
RAB3B  
TAC3  
KCNK12  
IGFBP1  
PLAC8  
TNNT3  
KRT24  
TPM1  
NAPRT1  
APOE  
LOC100132394  
ASCL2  
SPP1  
RNY5  
LGALS1  
LOC100134364  
NOTUM  
COL1A2  
COL1A1  
LUM  
LOC729708  
PLA2G7  
C5ORF13  
HBZ  
LOC652846  
S100A10  
FN1  
TGFB1  
SNCA  
KRT6C  
ANXA8L2  
HBM  
TNFSF10  
PLAC9  
NDUFS5  
CXCL14  
HLA-A29.1

**Downregulated with Disadvantage**

KRTAP26-1  
LHB  
CCK  
CGB1  
LOC653156  
MGC13057  
INSL4  
CGB5  
LPL  
CGB8  
LOC100129379  
GADD45G  
SNORD3D  
LOC100131205  
FRZB  
LOC100129685  
TCHH  
TFPI2  
LOC100129028  
CLDN8  
SNORD13  
GPNMB  
RPL21  
LOC391370  
CXCL1  
LOC646993  
UPLP  
CGB  
C7  
HS.291319  
LOC728672  
LOC645452  
UCK2  
LOC653079  
SLCO2A1  
RPL23  
RPN2  
NUCB2  
LOC100132291  
EEF1AL7  
LOC728244  
SHROOM4

|              |              |
|--------------|--------------|
| WNT7A        | CPXM2        |
| PRG2         | LOC388621    |
| LYPD5        | YES1         |
| PTGDS        | LOC653492    |
| C19ORF22     | LOC100131905 |
| IL2RB        | ZNF486       |
| MUC15        | BLZF1        |
| GLIPR1       | LOC729090    |
| CRABP2       | LOC654194    |
| AQP11        | LOC642934    |
| LOC100008588 | LOC389156    |
| TAGLN2       | RPL5         |
| RPS9         | LOC100132391 |
| KRT7         | NPFFR2       |
| IDH2         | IGSF5        |
| SELM         | COL17A1      |
| TMEM16B      | LDLR         |
| WFDC1        | LOC728590    |
| CFD          | FLJ44124     |
| LOC644743    | HTRA4        |
| LOC643319    | C4ORF19      |
| FLJ12684     | ABP1         |
| CAMK2N1      | ZNF69        |
| LAYN         | LOC642975    |
| VAV3         | MGC16121     |
| AIF1L        | LOC728973    |
| STAT4        | EIF3A        |
| COL5A1       | LOC728809    |
| JAM2         | HSPA1A       |
| ANO2         | PLEKHA6      |
| SERPINE2     | LOC338870    |
| CCL13        | LOC286512    |
| FSTL1        | MCART1       |
| FOLR3        | LEP          |
| BCAT1        | SOCS2        |
| CTSG         | CBLB         |
| DNASE1L3     | RPS28        |
| KRT8         | LOC100132727 |
| PTGES        | LOC100130168 |
| ICT1         | SLC38A2      |
| SLC25A37     | PERP         |
| FCER1G       | LOC647543    |
| LOC647954    | LOC100132499 |
| IDH1         | LOC729362    |
| MAL          | LOC645138    |

SPARC  
TNFRSF21  
HLA-G  
APOD  
ACTB  
MMP12  
GLO1  
LOC441763  
SERPINI1  
PTDSS1  
EEF1G  
ARHGDIB  
RAN  
TTC25  
COL5A2  
KRT14  
MAD2L2  
THSD3  
TMSB10  
EHBP1  
HS.570988  
ATP2C2  
ATP5O  
LOC646531

ZFP36L1  
LOC730313  
LOC653419  
PSG11  
LOC646785  
A2M  
LOC731640  
SIGLEC6  
LOC643284  
C1GALT1  
HIST1H1C  
FLJ43681  
PIK3AP1  
ARHGEF5L  
INSIG1  
LOC644039  
LOC645715  
HS.190748  
CGB7  
PDE4C  
LOC100134159  
HS.535028  
LOC100128084  
CHD1  
HOXB2  
LIMCH1  
LOC730740  
NDRG1  
STMN3  
PGM1  
HNRNPA2B1  
LOC647030  
ZNF738  
PSG5  
C21ORF55  
LOC645157  
ALDH3B2  
LOC286016  
C14ORF37  
LRRC32  
LOC100190938  
MMP11  
SNORD3A  
PDK4  
C9ORF80

ZDHHC1  
PHCA  
DMC1  
LOC641768  
FCGBP  
C8ORF13  
LOC643310  
TM9SF2  
MAGT1  
C4ORF26  
AIRE  
ATF4  
IL1R1  
LOC388532  
LOC653648  
CNIH4  
MGC26356  
PAPPA2  
GPC3  
ZNF91  
TWIST1  
SPARCL1  
LOC100132510  
PRRC1  
SBDS  
SEMA3B  
HMGCS2  
PNPT1  
IL13RA2  
LOC441377  
PEG10  
LOC100128062  
LOC100133649  
FNDC3A  
C2ORF69  
LOC389787  
CTGF  
SNX10  
TEAD3  
FARSLB  
LOC645979  
STEAP4  
SNORD3C  
LOC642947  
FLJ46309

LOC220433  
NLRP8  
LOC400721  
UBE3C  
SAR1A  
LOC100132992  
HSPB8  
LOC391656  
MEG3  
C18ORF54  
LOC646996  
ERAP2  
USP36  
FLJ35390  
CRH  
TPBG  
CDAN1  
AHSA2  
LOC100133177  
FAM107A  
GABPB2  
FLJ11292  
LOC442454  
PSG7  
NARS  
LOC728457  
EMD  
SLC44A4  
LOC728643  
HEBP2  
ZC3H11B  
TMEM108  
LOC727808  
CCDC109B  
TRIM25  
FOSB  
SLC7A10  
FAM98A  
LOC728620  
IFIT2  
LOC644745  
LOC387882  
NT5E  
LILRB1  
C8ORF37

PGRMC2  
PAM  
NOMO2  
RBM33  
TFAP2A  
UQCRHL  
LOC100128505  
RPL12P6  
FKTN  
STARD8  
LOC100129681
