# Supplementary material
Source: PubMed Central journal article supplement (PMC5493326)
Supplement: NIHMS871397-supplement-4.pdf [file NIHMS871397-supplement-4.pdf]

**Table S3.** TELIS analysis relating maternal disadvantage to bioinformatic indications of transcription factor activity in placenta biopsies.

| <b>Transcription Factor</b> | <b>Transfac TFBM</b> | <b>Mean Fold-Difference</b> | <b>Standard Error</b> | <b>p value</b> |
|-----------------------------|----------------------|-----------------------------|-----------------------|----------------|
| MAF                         | V\$VMAF_01           | 2.33                        | 0.815                 | 0.005          |
| OLF1                        | V\$OLF1_01           | 1.9                         | 0.418                 | 0.002          |
| EGR4                        | V\$NGFIC_01          | 1.85                        | 0.56                  | 0.026          |
| EGR2                        | V\$EGR2_01           | 1.72                        | 0.42                  | 0.021          |
| GATA1                       | V\$GATA_C            | 1.59                        | 0.27                  | 0.003          |
| AP1                         | V\$AP1_Q6            | 1.41                        | 0.226                 | 0.02           |
| NF- $\kappa$ B              | V\$NFKAPPAB_01       | 0.56                        | 0.128                 | 0.026          |
| CDX                         | V\$CDXA_02           | 0.65                        | 0.1                   | 0.014          |
| PBX1                        | V\$PBX1_01           | 0.62                        | 0.13                  | 0.049          |
| GFI1                        | V\$GFI1_01           | 0.66                        | 0.12                  | 0.048          |
| C/EBP                       | V\$CEBPB_01          | 0.72                        | 0.11                  | 0.038          |
| ETS1                        | V\$CETS1P54_01       | 0.65                        | 0.09                  | 0.003          |
| ELK1                        | V\$ELK1_02           | 0.58                        | 0.11                  | 0.007          |
| PAX5                        | V\$PAX5_02           | 0.42                        | 0.14                  | 0.032          |
| ATF                         | V\$ATF_01            | 0.47                        | 0.11                  | 0.005          |
| CREB                        | V\$CREB_01           | 0.29                        | 0.08                  | 0.0001         |
| NKX2-5                      | V\$NKX25_01          | 0.55                        | 0.08                  | 0.0004         |

**Note.** TELIS quantifies the prevalence of transcription factor binding motifs in promoters of differentially expressed genes. For details, see Cole SW et al. *Bioinformatics*. 2005;21 (6):803-810.
