# Supplementary material
Source: PubMed Central journal article supplement (PMC5493326)
Supplement: NIHMS871397-supplement-5.pdf [file NIHMS871397-supplement-5.pdf]

**Table S4.** Differentially expressed genes in newborn umbilical vein blood as a function of maternal social

**Upregulated with Disadvantage**

POTEF  
EBP  
LOC650116  
HS.534439  
CAP1  
LOC650898  
TCP11L2  
SCYL2  
CHCHD9  
HS.545422  
LOC100129522  
SNX4  
LOC642769  
NDE1  
RHOA  
FLJ46309  
C7ORF54  
LOC100129685  
EIF3J  
HS.193951  
RAP2A  
HS.103173  
MAP2K3  
TBC1D4  
RN5S9  
MAP1S  
LOC643433  
C17ORF45  
LILRB1  
LOC100132289  
PPPDE2  
PDLIM7  
RILP  
RNU6-1  
TSPY3  
KPNA1  
NR1D1  
PASK  
MARCH<sup>6</sup>  
FBXW4  
LOC285501  
RDH5

**Downregulated with Disadvantage**

CSH1  
CSH2  
CSHL1  
GH1  
LAIR2  
GZMB  
TMEM158  
EGR1  
MAOA  
HEBP1  
S100P  
EFHD1  
CGA  
PSG4  
COBLL1  
TRIB1  
CHST13  
PSG3  
HSD3B1  
HSD17B1  
ANPEP  
CST7  
GZMH  
EPAS1  
CFD  
CA4  
C1ORF115  
FCRLA  
HBEGF  
IL8  
CLEC4D  
HOPX  
LGALS14  
LOC646723  
DAB2  
LOC100131967  
CYP11A1  
PRF1  
MMP9  
FOS  
VPREB3  
IL18RAP

LOC646630  
HS.126768  
HAGH  
HS.484967  
SLC2A3  
BCL2L13  
LOC730246  
LOC440926  
STOM  
LOC728888  
RGS10  
PRAF2  
RPS6KB2  
LOC100129424  
UBC  
LOC651697  
MICAL2  
ZNF430  
HS.291319  
CMPK1  
TRABD  
ISCA1  
LOC100133609  
TMEM63B  
PPM1A  
SELK  
NCOA4  
TMEM56  
AKR1D1  
DCAF10  
RP11-529110.4  
EIF3L  
LOC653156  
LTA4H  
CLUAP1  
CTNNAL1  
C6ORF190  
AQP9  
MFN2  
FCGBP  
HS.570988  
RPS18  
FCN1  
DYNLL2  
CDKL1

HLA-DQB1  
MAFB  
TCL1A  
CRYAB  
LOC652493  
CGB8  
JUN  
MMP8  
KISS1  
PGF  
EBI3  
LY86  
IMPA2  
IGLL1  
CDKN1A  
ECHDC3  
HLA-DOB  
GADD45G  
IL1R2  
S1PR5  
ACTA2  
TNS3  
HLA-DRB4  
RNASE2  
ADAM12  
RAI14  
LOC642113  
LGALS13  
UPLP  
SORT1  
HDC  
HS.564949  
CD19  
HK3  
LOC100133583  
PSG9  
ANXA3  
SNORD13  
SH3TC1  
SPIB  
KIAA1862  
PAM  
LOC649143  
CD79A  
FOSB

MIR639  
SLC25A46  
RNF14  
LOC285176  
LRRN3  
FAM83A  
CYBA  
SRP72  
LOC645895  
CCR6  
MSH3  
NACA  
LOC653421  
LOC653232  
LOC730740  
LOC286444  
LOC643509  
NRD1  
LOC642250  
GGA1  
LOC647856  
LOC100131726  
LOC401537  
PCBP1  
GNAS  
MT1G  
FKBP8  
LOC651612  
LOC647363  
ZBTB44  
HS.538554  
RMND5A  
TSPYL6  
GIMAP1  
C20ORF52  
CD8A  
ACP5  
LOC253039  
PGM2L1  
LOC646849  
LOC100128505  
EIF3H  
C9ORF40  
DUSP19  
HLA-G

ORM1  
H19  
LOC284422  
RHOBTB3  
PSG2  
TMEM149  
TF  
HEBP2  
THBS1  
LOC648526  
LOC730415  
CCL3L3  
IRF8  
HP  
CLDND2  
CD55  
SNHG5  
MMP25  
HSPB8  
GNLY  
SLC2A8  
C10ORF116  
RNASE6  
HSPA1B  
CD79B  
CD160  
CGB5  
POU2AF1  
LOC652694  
LOC647450  
LCN2  
HES4  
TLR4  
LOC647506  
LOC401268  
UCK2  
LOC284757  
PAPPA  
GPR56  
HLA-DRB3  
CYP27A1  
C5AR1  
RAB31  
PTGS2  
HS.508682

TTC32  
C21ORF55  
C1ORF52  
CD5  
AIDA  
CD2AP  
STAU1  
LOC100127993  
PFN1  
CDAN1  
LOC729324  
FECH  
CA8  
PSMB10  
LOC729301  
POFUT1  
ECSIT  
LOC388796  
DCUN1D1  
STXBP2  
PCSK1N  
MTE  
ISG20  
LOC100131713  
C14ORF85  
TSTA3  
SERF2  
DCTN4  
SQSTM1  
FAM39E  
HS.481659  
HS.493239  
POLR3E  
RPLP2  
BCL2L1  
CD52  
EPN1  
GYPE  
FKTN  
RHCE  
LOC389435  
LOC388556  
LOC283953  
CRIP1  
PCGF5

SPATA20  
GH2  
LOC100133678  
CEBPA  
S100A11  
CSRP1  
C3AR1  
ZFP36  
CLEC5A  
CKAP4  
GLDN  
HS.566395  
CXXC5  
EGR2  
C11ORF75  
PKIB  
CENTA1  
TLE1  
PSG5  
CCL3  
OSM  
FGD2  
TMEM54  
H3F3B  
OSCAR  
C10ORF10  
FAM179A  
CD300C  
CD72  
AXUD1  
LOC158381  
SYK  
HIPK2  
ATP6AP1L  
CLIC3  
CSF1R  
GFOD1  
ARG1  
MGC29506  
ANXA2  
PAGE4  
CAPN6  
ARF3  
LOC283663  
FAM65B

UNC84B  
ATP5E  
KIAA0748  
HBBP1  
MT2A  
LOC347544  
SRRD  
NELL2  
LZTFL1  
KLF2  
HBG2  
RPS20  
LOC341457  
DEFA3  
LOC729603  
MARCH<sup>2</sup>  
SLC7A1  
OLFM4  
PAQR8  
LOC644039  
CARM1  
DEFA1  
XK  
ATP5B  
RPSA  
LOC441481  
FLOT2  
C14ORF153  
HLA-DRB5  
ALAS2  
NPL  
LOC729742  
CDC34  
LOC441019  
ROCK2  
HK1  
LOC100133233  
TMCC2  
C18ORF10  
LOC643863  
GALNT4  
LOC645296  
FCGR3B  
LOC653079  
FAM20B

DUSP1  
HS.276854  
FCGR3A  
NPC2  
TIMP2  
OLR1  
VCAN  
VSTM1  
LOC100131391  
TCN1  
PGLYRP1  
SERPINB2  
FAM129C  
HTRA1  
PLEK  
MSRB2  
NLRC4  
SWAP70  
LAMA5  
HS.201441  
HLA-DRB6  
PHCA  
ACAD9  
FLJ22662  
CRISPLD2  
TOP2A  
CD24  
TM4SF1  
ZBED1  
PRAM1  
PGD  
KIR2DL2  
SH2D1B  
RASGRP3  
RALB  
ESAM  
ALOX5AP  
CNN3  
ZBTB16  
VWF  
GM2A  
TBC1D3I  
NUDT16  
LOC728650  
MMD

STK11  
RPL13A  
LOC641814  
IL18  
LOC643531  
RPL12  
C2ORF89  
LOC653881  
LOC731365  
CES3  
TMEM66  
TMOD1  
NDUFAF3  
CCNDBP1  
MYL4  
LOC643284  
MT1A  
OR2W3  
CRYBB2  
UCP2  
LOC439949  
IMAA  
LOC728517  
LOC646531  
LOC100128731  
ST13  
YBX1  
RPL27A  
TMEM183A  
GIMAP4  
TMSB4X  
LOC730187  
SEPT^9  
LOC645058  
LOC650276  
CREG1  
LOC440313  
LOC343184  
RNF10  
TOR2A  
FAU  
WASF2  
LOC441876  
LAIR1  
NAP1L4

USF1  
HIST2H2BE  
TWIST1  
EZR  
CEACAM1  
LOC441268  
ITGAM  
FHL3  
IL2RB

LOC400948  
LOC644936  
PF4V1  
LOC387930  
LOC338870  
LOC100130446  
LOC284821  
EEF1G  
LOC391370  
LOC652071  
CISD2  
HS.554324  
RPL30  
UBB  
BPGM  
RPL41  
FIS1  
RPS5  
KRT1  
FOLR3  
GCAT  
TMSB10  
LOC441087  
ZMAT2  
IFI27  
TERF2IP  
LOC100133607  
RNF11  
MT1X  
NUCB1  
C5ORF4  
HPS1  
CTSB  
LOC647099  
HS.57079  
LOC441034  
LOC100129158  
RPS11  
CHPT1  
FAM46C  
LOC100133465  
FAM104A  
RNU1A3  
ASCC2  
LOC440055

LOC653778  
UBAC1  
TMEM183B  
RNF182  
LOC728937  
RPS3  
IGF2BP2  
LOC645174  
LOC100133876  
CSDA  
HBB  
TMEM86B  
LOC649076  
RPS25  
MRFAP1  
ANXA2P2  
LOC100130553  
COX7A2  
LOC100133273  
LOC440733  
LOC642210  
CDKN2D  
ATP6V1D  
FEM1A  
GNB2L1  
BSG  
LOC100134364  
LOC100132394  
CHD8  
RPS10  
LOC440575  
CCNI  
SH3GLB2  
RNU1G2  
RNU1-3  
LOC654103  
MED25  
RHD  
UROD  
PIP4K2A  
RPS12  
LOC389599  
YIPF6  
PSME4  
FOXO4



TMEM111  
C20ORF108  
SELENBP1  
E2F2  
JUND  
GMPR  
EPB49  
TUBB4Q  
SLC25A37  
HLA-DRB1  
HBM  
AHSP  
GLRX5  
LOC729708  
LOC388588  
HBE1  
GPX1  
RAP1GAP  
RUNDC3A  
PIP5K2A  
HLA-A29.1  
TUBB2A
