# Supplementary material
Source: PubMed Central journal article supplement (PMC5493326)
Supplement: NIHMS871397-supplement-6.pdf [file NIHMS871397-supplement-6.pdf]

**Table S5.** TELIS analysis relating maternal disadvantage to bioinformatic indications of transcription factor activity in newborn cord blood.

| <b>Transcription Factor</b> | <b>Transfac TFBM</b> | <b>Mean Fold-Difference</b> | <b>Standard Error</b> | <b>p value</b> |
|-----------------------------|----------------------|-----------------------------|-----------------------|----------------|
| EVI1                        | V\$EVI1_04           | 0.27                        | 0.07                  | 0.0001         |
| STAT3                       | V\$STAT3_01          | 0.32                        | 0.1                   | 0.004          |
| NF- $\kappa$ B              | V\$NFKAPPAB_01       | 0.55                        | 0.1                   | 0.004          |
| TAL1                        | V\$TAL1BETAE47_01    | 0.63                        | 0.12                  | 0.024          |
| AP1                         | V\$AP1_Q6            | 0.75                        | 0.07                  | 0.004          |
| C/EBP- $\beta$              | V\$CEBPB_02          | 0.64                        | 0.12                  | 0.029          |
| EGR1                        | V\$EGR1_01           | 2.19                        | 0.79                  | 0.012          |
| EGR3                        | V\$EGR3_01           | 2.01                        | 0.74                  | 0.029          |
| GATA1                       | V\$GATA_C            | 1.29                        | 0.14                  | 0.033          |
| ETS1                        | V\$CETS1P54_01       | 1.43                        | 0.22                  | 0.014          |
| cMyb                        | V\$VMYB_02           | 1.99                        | 0.32                  | 0.0001         |

**Note.** TELIS quantifies the prevalence of transcription factor binding motifs in promoters of differentially expressed genes. For details, see Cole SW et al. *Bioinformatics*. 2005;21 (6):803-810.
